# Supplementary material for: Precancer and cancer-associated depression and anxiety among older adults with blood cancers in the United States
Source: PubMed Central journal article supplement — Blood Adv. 2022 Feb 11;6(4):1126–36. doi: 10.1182/bloodadvances.2021005862 (PMC8864638; doi:10.1182/bloodadvances.2021005862), 2022-02-11
Supplement: advancesADV2021005862-suppl1.pdf [file advancesADV2021005862-suppl1.pdf]

**Supplemental Table 1—ICD-9 and ICD-10 codes used for depression and anxiety diagnoses**

|                      | ICD-9                                                                                                 | ICD-10                                                                                                                                                   | HCPCS        |
|----------------------|-------------------------------------------------------------------------------------------------------|----------------------------------------------------------------------------------------------------------------------------------------------------------|--------------|
| Depression Diagnoses | 296.20, 296.22, 296.23, 296.30, 296.31, 296.32, 296.33, 296.34, 300.4, 301.12, 309.0, 309.1, 311      | F32, F32.0, F32.1, F32.2, F32.3, F32.4, F32.5, F32.8, F32.89, F32.9, F33, F33.0, F33.1, F33.2, F33.3, F33.4, F33.40, F33.41, F33.42, F33.8, F33.9, F34.1 | G8431, G8511 |
| Anxiety Diagnoses    | 293.84, 300.00, 300.01, 300.02, 300.09, 300.10, 300.20, 300.21, 300.22, 300.23, 300.29, 308.0, 309.24 | F40, F40.00, F40.00, F40.01, F40.02, F40.1, F30.10, F40.11, F40.8, F40.9, F41, F41.0, F41.1, F41.3, F41.8, F41.9, F43.22                                 |              |

**Supplemental Table 2—Multivariate analysis of sociodemographic factors associated with cancer-associated depression up to 6 months after blood cancer diagnosis**

| Characteristic                                                     |                           | Odds Ratio | 95% Confidence Interval |
|--------------------------------------------------------------------|---------------------------|------------|-------------------------|
| <b>Sex</b>                                                         | Male                      | Ref        |                         |
|                                                                    | Female                    | 1.28       | 1.17 – 1.39             |
| <b>Diagnosis</b>                                                   | Lymphoma                  | Ref        |                         |
|                                                                    | Myeloma                   | 1.35       | 1.22 – 1.50             |
|                                                                    | Leukemia                  | 1.16       | 1.01 – 1.33             |
|                                                                    | Myelodysplastic syndromes | 0.98       | 0.84 – 1.13             |
| <b>Age (yrs)</b>                                                   | 67-69                     | Ref        |                         |
|                                                                    | 70-74                     | 1.08       | 0.93 – 1.25             |
|                                                                    | 75-79                     | 1.04       | 0.90 – 1.21             |
|                                                                    | ≥80                       | 1.12       | 0.98 – 1.29             |
| <b>Marital status</b>                                              | Married                   | Ref        |                         |
|                                                                    | Not married               | 1.15       | 1.05 – 1.25             |
| <b>Race</b>                                                        | White                     | Ref        |                         |
|                                                                    | Non-White                 | 0.81       | 0.71 – 0.94             |
| <b>Education (census tract quintile) *</b>                         | 1 (lowest)                | Ref        |                         |
|                                                                    | 2                         | 0.93       | 0.81 – 1.05             |
|                                                                    | 3                         | 0.89       | 0.78 – 1.02             |
|                                                                    | 4                         | 0.88       | 0.77 – 1.02             |
|                                                                    | 5 (highest)               | 0.85       | 0.73 – 0.98             |
| <b>Median income (census tract quintile) +</b>                     | 1 (lowest)                | Ref        |                         |
|                                                                    | 2                         | 1.07       | 0.94 – 1.22             |
|                                                                    | 3                         | 1.01       | 0.88 – 1.15             |
|                                                                    | 4                         | 1.05       | 0.91 – 1.20             |
|                                                                    | 5 (highest)               | 1.04       | 0.90 – 1.19             |
| <b>Surveillance, Epidemiology, and End Results registry region</b> | Midwest                   | Ref        |                         |
|                                                                    | Northeast                 | 0.64       | 0.56 – 0.75             |
|                                                                    | South                     | 0.82       | 0.71 – 0.94             |
|                                                                    | West                      | 0.82       | 0.72 – 0.93             |
| <b>Charlson comorbidity score</b>                                  | 0                         | Ref        |                         |
|                                                                    | 1                         | 1.26       | 1.14 – 1.39             |
|                                                                    | 2+                        | 1.61       | 1.46 – 1.78             |
| <b>Pre-cancer anxiety</b>                                          | Absent                    | Ref        |                         |
|                                                                    | Present                   | 3.02       | 2.66 – 3.42             |

Analysis included patients who survived at least 6 months' post blood cancer diagnosis to ensure complete claims data for anxiety and depression in the six month period. The prevalence of CA-depression or CA-anxiety in this cohort was 6.6%.

\*Quintiles based on percentage of individuals 25 years and older with some college education in a census tract

+Quintiles based on the median household or per capital income within each census tract

**Supplemental Table 2—Multivariate analysis of sociodemographic factors associated with cancer-associated anxiety up to 6 months after blood cancer diagnosis**

| Characteristic                                                     |                           | Odds Ratio | 95% Confidence Interval |
|--------------------------------------------------------------------|---------------------------|------------|-------------------------|
| <b>Sex</b>                                                         | Male                      | Ref        |                         |
|                                                                    | Female                    | 1.97       | 1.78 – 2.18             |
| <b>Diagnosis</b>                                                   | Lymphoma                  | Ref        |                         |
|                                                                    | Myeloma                   | 1.16       | 1.03 – 1.31             |
|                                                                    | Leukemia                  | 1.04       | 0.89 – 1.21             |
|                                                                    | Myelodysplastic syndromes | 0.75       | 0.62 – 0.91             |
| <b>Age</b>                                                         | 67-69                     | Ref        |                         |
|                                                                    | 70-74                     | 0.94       | 0.81 – 1.09             |
|                                                                    | 75-79                     | 0.74       | 0.63 – 0.86             |
|                                                                    | ≥80                       | 0.71       | 0.61 – 0.82             |
| <b>Marital status</b>                                              | Married                   | Ref        |                         |
|                                                                    | Non-married/Other         | 0.97       | 0.88 – 1.07             |
| <b>Race</b>                                                        | White                     | Ref        |                         |
|                                                                    | Non-White                 | 0.73       | 0.63 – 0.86             |
| <b>Education (census tract quintile) *</b>                         | 1 (lowest)                | Ref        |                         |
|                                                                    | 2                         | 0.90       | 0.77 – 1.04             |
|                                                                    | 3                         | 0.95       | 0.82 – 1.11             |
|                                                                    | 4                         | 1.05       | 0.90 – 1.22             |
|                                                                    | 5 (highest)               | 0.97       | 0.83 – 1.14             |
| <b>Median income (census tract quintile) +</b>                     | 1 (lowest)                | Ref        |                         |
|                                                                    | 2                         | 0.95       | 0.82 – 1.10             |
|                                                                    | 3                         | 0.91       | 0.78 – 1.05             |
|                                                                    | 4                         | 0.83       | 0.71 – 0.97             |
|                                                                    | 5 (highest)               | 0.83       | 0.71 – 0.97             |
| <b>Surveillance, Epidemiology, and End Results registry region</b> | Midwest                   | Ref        |                         |
|                                                                    | Northeast                 | 0.86       | 0.71 – 1.03             |
|                                                                    | South                     | 1.43       | 1.22 – 1.68             |
|                                                                    | West                      | 1.12       | 0.96 – 1.31             |
| <b>Charlson comorbidity score</b>                                  | 0                         | Ref        |                         |
|                                                                    | 1                         | 1.10       | 0.98 – 1.23             |
|                                                                    | 2+                        | 1.01       | 0.90 – 1.14             |
| <b>Year of diagnosis</b>                                           | 2000 – 2003               | Ref        |                         |
|                                                                    | 2004 – 2007               | 1.18       | 1.01 – 1.36             |
|                                                                    | 2008 – 2011               | 1.63       | 1.42 – 1.88             |
|                                                                    | 2012 – 2015               | 2.10       | 1.83 – 2.41             |
| <b>Pre-cancer depression</b>                                       | Absent                    | Ref        |                         |
|                                                                    | Present                   | 2.96       | 2.62 – 3.34             |

Analysis included patients who survived at least 6 months' post blood cancer diagnosis to ensure complete claims data for anxiety and depression in the six month period. The prevalence of CA-depression or CA-anxiety in this cohort was 6.6%

\*Quintiles based on percentage of individuals 25 years and older with some college education in a census tract

+Quintiles based on the median household or per capital income within each census tract
